# Supplementary material for: Environmental Conditions Modulate the Transcriptomic Response of Both Caulobacter crescentus Morphotypes to Cu Stress
Source: MDPI journal article supplement (doi:10.3390/microorganisms9061116), 2021-05-21
Supplement: s1 [file s1]

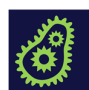

# Supplementary Materials

Supplementary Table S1. Raw read counts of tagRNA-Seq libraries.

| Sample |    |    |   | Unassigned reads | TSS reads | PSS reads | Total reads |
|--------|----|----|---|------------------|-----------|-----------|-------------|
| M2G    | St | Cu | 1 | 7029956          | 941625    | 1996589   | 9968170     |
|        |    |    | 2 | 6493672          | 772038    | 1343006   | 8608716     |
|        |    |    | 3 | 5637679          | 804827    | 1432578   | 7875084     |
|        |    | Ct | 1 | 6555009          | 742017    | 1496397   | 8793423     |
|        |    |    | 2 | 7052540          | 800345    | 1684963   | 9537848     |
|        |    |    | 3 | 6574748          | 801229    | 1740855   | 9116832     |
|        | Sw | Cu | 1 | 8011110          | 1100154   | 2198595   | 11309859    |
|        |    |    | 2 | 6211153          | 909899    | 1597453   | 8718505     |
|        |    |    | 3 | 5336313          | 685777    | 1557530   | 7579620     |
|        |    | Ct | 1 | 6221880          | 684872    | 1911990   | 8818742     |
|        |    |    | 2 | 6651033          | 840671    | 1689593   | 9181297     |
|        |    |    | 3 | 6777805          | 572727    | 1195243   | 8545775     |
| PYE    | St | Cu | 1 | 7700765          | 2759732   | 1875608   | 12336105    |
|        |    |    | 2 | 8225721          | 2959976   | 2319953   | 13505650    |
|        |    |    | 3 | 8770754          | 2715491   | 2418996   | 13905241    |
|        |    | Ct | 1 | 9130811          | 2447386   | 2087056   | 13665253    |
|        |    |    | 2 | 8637565          | 2408231   | 2113804   | 13159600    |
|        |    |    | 3 | 8409195          | 2472966   | 2020761   | 12902922    |
|        | Sw | Cu | 1 | 8585751          | 3735415   | 2590338   | 14911504    |
|        |    |    | 2 | 8272520          | 3076795   | 2754637   | 14103952    |
|        |    |    | 3 | 8643418          | 2838859   | 2561540   | 14043817    |
|        |    | Ct | 1 | 8530708          | 2490665   | 2371096   | 13392469    |
|        |    |    | 2 | 7731070          | 2765604   | 2252039   | 12748712    |
|        |    |    | 3 | 8850095          | 2783986   | 2593916   | 14227997    |

**Supplementary Table S2:** Overrepresented eggNOG classes calculated from the differential expression analysis of several tagRNA-seq contrasts.

| Contrast    | Overrepresented eggNOG class | Class content                                                 | p-value                 |
|-------------|------------------------------|---------------------------------------------------------------|-------------------------|
| MStCu-MStCt | O                            | Posttranslational modification, protein turnover, chaperones  | 5.98*10 <sup>-104</sup> |
|             | J                            | Translation, ribosomal structure and biogenesis               | 6.49*10 <sup>-28</sup>  |
|             | C                            | Energy production and conversion                              | 7.26*10 <sup>-5</sup>   |
|             | V                            | Defense mechanisms                                            | 2.58*10 <sup>-3</sup>   |
| MSwCu-MSwCt | O                            | Posttranslational modification, protein turnover, chaperones  | 3.29*10 <sup>-3</sup>   |
|             | V                            | Defense mechanisms                                            | 1.99*10 <sup>-2</sup>   |
| PStCu-PStCt | P                            | Inorganic ion transport and metabolism                        | 3.13*10 <sup>-8</sup>   |
| PSwCu-PSwCt | U                            | Intracellular trafficking, secretion, and vesicular transport | 6.11*10 <sup>-3</sup>   |
| MCt-PCt     | E                            | Amino acid transport and metabolism                           | 9.84*10 <sup>-36</sup>  |
|             | T                            | Signal transduction mechanisms                                | 7.33*10 <sup>-14</sup>  |
|             | G                            | Carbohydrate transport and metabolism                         | 8.04*10 <sup>-5</sup>   |
|             | N                            | Cell motility                                                 | 2.02*10 <sup>-2</sup>   |
|             | P                            | Inorganic ion transport and metabolism                        | 3.65*10 <sup>-2</sup>   |
|             | F                            | Nucleotide transport and metabolism                           | 4.77*10 <sup>-2</sup>   |

**Supplementary Table S3.** Differentially expressed small regulatory RNAs and their top 3 putative target genes, based on maximal binding free energy.

| sRNA  | Log2(FC) of Cu-Ct |        |        |        | Target gene accession <sup>1</sup> | Gene product                                      | Binding site <sup>2</sup> |
|-------|-------------------|--------|--------|--------|------------------------------------|---------------------------------------------------|---------------------------|
|       | M2G St            | M2G Sw | PYE St | PYE Sw |                                    |                                                   |                           |
| R0002 | 4.65              | 0.30   | 0.59   | 0.33   | 01301                              | NAD dependent formate dehydrogenase alpha subunit | 2038><2108                |
|       |                   |        |        |        | 02875                              | Hypothetical protein                              | 55><81                    |
|       |                   |        |        |        | 02651                              | Drug/metabolite exporter                          | -188><-160                |
| R0032 |                   |        |        |        | 02892                              | Hypothetical protein                              | -15><3                    |
|       |                   |        |        |        | 01081                              | Hypothetical protein                              | 38><58                    |
|       |                   |        |        |        | 03699                              | M16 family peptidase                              | 2538><2554                |
| R0078 |                   |        |        |        | 03523                              | Hypothetical protein                              | -153><-124                |
|       |                   |        |        |        | 00723                              | Glyoxalase family protein                         | 138><159                  |
|       |                   |        |        |        | 02370                              | TonB-dependent maltose transporter MalA           | 1822><1850                |
| R0088 | 3.79              | 1.35   | 1.74   | -0.10  | 03779                              | Cytosolic protein                                 | -179><-150                |
|       |                   |        |        |        | 02816                              | Hypothetical protein                              | 130><147                  |
|       |                   |        |        |        | 02454                              | N-methylhydantoinase (ATP hydrolyzing)            | 3640><3657                |

|                    |      |       |      |       |       |                                                                   |                        |
|--------------------|------|-------|------|-------|-------|-------------------------------------------------------------------|------------------------|
| R0092              |      |       |      |       | 02816 | Hypothetical protein                                              | 121><144               |
|                    |      |       |      |       | 00664 | C4 dicarboxylate transport protein                                | 45><67                 |
|                    |      |       |      |       | 02642 | UDP-N-acetylmuramoylalanyl-D-glutamate-2,6-diaminopimelate ligase | 196><211               |
| R0095              |      |       |      |       | 00006 | Enoyl-CoA hydratase                                               | 271><789               |
| R0097              | 0.82 | 0.66  | 4.19 | 0.51  | 02483 | Acyl-CoA synthetase                                               | -34><-24               |
|                    |      |       |      |       | 00739 | Hypothetical protein                                              | 55><65                 |
|                    |      |       |      |       | 03872 | tRNA modification GTPase TrmE                                     | 1053><1061             |
| R0100 <sup>3</sup> | 3.12 | 1.21  | 0.22 | 0.37  | 03108 | TonB-dependent receptor                                           | -70><-59 &<br>-20><-10 |
| R0110              | 1.18 | 0.67  | 1.80 | -0.01 | 00546 | Hypothetical protein                                              | -195><-166             |
|                    |      |       |      |       | 00545 | Acetoacetyl-CoA reductase                                         | 651><680               |
|                    |      |       |      |       | 00817 | L-sorbose dehydrogenase                                           | 1299><1324             |
| R0111              |      |       |      |       | 00593 | Hypothetical protein                                              | 1177><1584             |
| R0119              | 3.87 | 2.68  | 0.52 | 1.17  | 01083 | Hypothetical protein                                              | -110><-86              |
|                    |      |       |      |       | 00275 | Transposase                                                       | -167><-146             |
|                    |      |       |      |       | 01895 | MFS superfamily transporter                                       | 1244><1258             |
| R0128              | 1.37 | 0.78  | 2.74 | -0.03 | 01034 | TonB-dependent outer membrane receptor                            | -28><1                 |
|                    |      |       |      |       | 00423 | Phosphohydrolase                                                  | -110><-85              |
|                    |      |       |      |       | 03204 | Alanine racemase                                                  | -96><-74               |
| R0131              |      |       |      |       | 00697 | Hypothetical protein                                              | 300><321               |
|                    |      |       |      |       | 02509 | Glycosyltransferase HfsG                                          | 594><613               |
|                    |      |       |      |       | 02270 | MarR-family transcriptional regulator                             | -20><-4                |
| R0134              | 3.18 | -0.88 | 1.56 | 0.59  | 01174 | LysR family transcriptional regulator                             | -96><-68               |
|                    |      |       |      |       | 00181 | Type II secretion pathway protein M                               | -158><-143             |
|                    |      |       |      |       | 00471 | GDP L-fucose synthase                                             | -188><-172             |
| R0140              | 1.44 | 0.64  | 0.41 | 0.52  | 02329 | Exodeoxyribonuclease VII large subunit                            | -110><-89              |
|                    |      |       |      |       | 00771 | Hypothetical protein                                              | 89><118                |
|                    |      |       |      |       | 00798 | CydC ATP-binding protein (ABC transport)                          | -68><-43               |
| R0143              |      |       |      |       | 01584 | Multimodular transglycosylase                                     | -169><-142             |
|                    |      |       |      |       | 02235 | Putative secreted protein                                         | -75><-47               |
|                    |      |       |      |       | 00989 | Acyl-esterase                                                     | 11><26                 |
| R0158              | 1.39 | -0.28 | 7.85 | 0.02  | 02221 | Methionine synthase I MetH                                        | 496><507               |
|                    |      |       |      |       | 01382 | Long chain fatty acid-CoA ligase                                  | 1432><1448             |
|                    |      |       |      |       | 00056 | Ribosomal protein S18 acetyltransferase                           | 410><426               |
| R0161              | 3.26 | 0.17  | 3.01 | 0.38  | 03167 | Hypothetical protein                                              | 469><492               |
|                    |      |       |      |       | 01215 | Histidine triad protein                                           | 388><401               |
|                    |      |       |      |       | 03168 | Hypothetical protein                                              | 517><537               |
| R0162              |      |       |      |       | 02324 | Hsp33-like chaperonin                                             | -176><-148             |
|                    |      |       |      |       | 01651 | DNA gyrase subunit A                                              | -186><-161             |
|                    |      |       |      |       | 00105 | MarC-family integral membrane protein                             | -151><-124             |
| R0169              | 1.69 | 0.86  | 1.54 | 0.00  | 02606 | Hybrid histidine kinase/receiver domain protein                   | 842><871               |

|       |      |      |      |      |       |                                            |            |
|-------|------|------|------|------|-------|--------------------------------------------|------------|
|       |      |      |      |      | 01515 | C4 dicarboxylate transporter large subunit | 633><659   |
|       |      |      |      |      | 01604 | Hypothetical protein                       | 52><73     |
| R0182 | 2.85 | 3.32 | 0.48 | 0.15 | 02949 | Hypothetical protein                       | -167><-140 |
|       |      |      |      |      | 03128 | Drug/metabolite exporter                   | -53><-25   |
|       |      |      |      |      | 00276 | Hypothetical protein                       | 274><298   |
| R0199 | 4.93 | 1.27 | 1.81 | 0.04 | 02024 | NADH dehydrogenase I subunit F             | -83><-58   |
|       |      |      |      |      | 02172 | Transporter                                | 1323><1350 |
|       |      |      |      |      | 01650 | Cu/Zn superoxide dismutase                 | 8><24      |

**Supplementary Table S4.** Primers used for qPCR.

| Name         | Sequence (5' → 3')    |
|--------------|-----------------------|
| mreB_F       | CATCGAGGCCAAGCAGATGC  |
| mreB_R       | AGCCCTTGCGTTGTGAACC   |
| pcoB_F       | CGCCCTATTGGTTCGAGCTG  |
| pcoB_R       | GTTGCAGGATCAGCCTCTGG  |
| CCNA_00028_F | ATAGTTGGTGAACGCCCAGG  |
| CCNA_00028_R | ACGATCGCTACGAGAGCAAG  |
| CCNA_00140_F | GATGGATCCCATCCTGGGGA  |
| CCNA_00140_R | AGAACCACAGCTTATGGCCC  |
| CCNA_01010_F | CCAGGACCCCTACTGCCT    |
| CCNA_01010_R | GAAGATCAGCGGATTGTCCGA |

**Supplementary Table S5:** Positions of Cu<sup>2+</sup> stress-induced intragenic and antisense TSSs. Log2-fold change due to Cu<sup>2+</sup> stress in disparate experimental conditions, as well as genomic context are shown for each TSS. Previously known TSSs are shown in bold.

| 5' position    | end | Putative end position | 3' position | Strand | M2G induction | St | M2G induction | Sw | PYE induction | St | PYE induction | Sw | Genomic context     |
|----------------|-----|-----------------------|-------------|--------|---------------|----|---------------|----|---------------|----|---------------|----|---------------------|
| 779445         |     |                       |             | +      | 3.34          |    | -0.27         |    | 0.60          |    | 0.06          |    | aTSS of 00721       |
| 1160259        |     |                       |             | +      | 2.58          |    | 1.80          |    | -0.20         |    | 0.04          |    | iTSS of 01059       |
| 1868809        |     |                       |             | +      | 3.54          |    | 0.06          |    | 0.00          |    | 2.06          |    | aTSS of 01738       |
| 2481274        |     |                       |             | -      | 4.91          |    | -0.27         |    | 0.00          |    | 0.57          |    | aTSS of 02341       |
| 3198577        |     |                       |             | +      | 3.66          |    | -1.12         |    | -0.12         |    | -0.09         |    | aTSS of 03043       |
| <b>3294538</b> |     |                       |             | -      | 1.12          |    | 0.28          |    | 0.30          |    | 0.34          |    | Long 5'UTR of 03142 |
| 3328034        |     |                       |             | -      | 2.35          |    | 0.51          |    | 1.96          |    | 2.69          |    | aTSS of 03169       |
| 3579018        |     |                       |             | -      | 5.11          |    | 1.83          |    | 2.50          |    | 0.59          |    | aTSS of 03906       |
| 3579126        |     |                       |             | -      | 4.69          |    | 1.36          |    | 2.07          |    | 0.68          |    | aTSS of 03906       |
| 3579259        |     |                       |             | -      | 4.81          |    | 1.33          |    | 1.90          |    | 0.54          |    | aTSS of 03906       |
| 3722203        |     |                       |             | -      | 5.26          |    | 0.69          |    | 0.00          |    | 1.04          |    | aTSS of 03567       |
| 3946388        |     |                       |             | +      | 3.19          |    | -1.25         |    | 3.63          |    | -0.12         |    | iTSS of R0092       |

**Supplementary Table S6:** Genes putatively transcribed from multiple TSSs and their corresponding alternative TSS positions. Previously known TSSs are shown in bold.

| Accession N° | Gene         | Strand | Start codon position | TSS 1          | TSS 2          | TSS 3          |
|--------------|--------------|--------|----------------------|----------------|----------------|----------------|
| CCNA_00011   | <i>dnaJ</i>  | +      | 10223                | 10178          | 10092          | 10075          |
| CCNA_00721   | <i>groEL</i> | -      | 779585               | 779585         | 779608         | 779703         |
| CCNA_01261   |              | +      | 1388006              | 1387963        | 1387950        |                |
| CCNA_01341   |              | +      | 1454414              | 1454394        | 1454375        | 1454280        |
| CCNA_02039   | <i>clpX</i>  | -      | 2185128              | <b>2185230</b> | <b>2185325</b> |                |
| CCNA_02552   | <i>clpS</i>  | +      | 2699457              | <b>2699418</b> | 2699367        | <b>2699283</b> |
| CCNA_02845   | <i>uzcR</i>  | -      | 2998187              | <b>2998223</b> | <b>2998266</b> |                |
| CCNA_02846   |              | -      | 3000222              | 3000341        | <b>3000364</b> |                |
| CCNA_02860   |              | -      | 3013060              | <b>3013083</b> | 3013098        |                |
| CCNA_03299   |              | +      | 3472717              | <b>3472677</b> | 3472603        |                |
| CCNA_03362   | <i>sigF</i>  | -      | 3541812              | <b>3541814</b> | 3542003        |                |
| CCNA_03483   |              | -      | 3646517              | <b>3646553</b> | 3646572        |                |
| CCNA_03706   |              | +      | 3874686              | 3874440        | 3874475        | <b>3874612</b> |
| CCNA_R0095   |              | -      | 4950                 | 5035           | 5053           | 5188           |

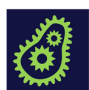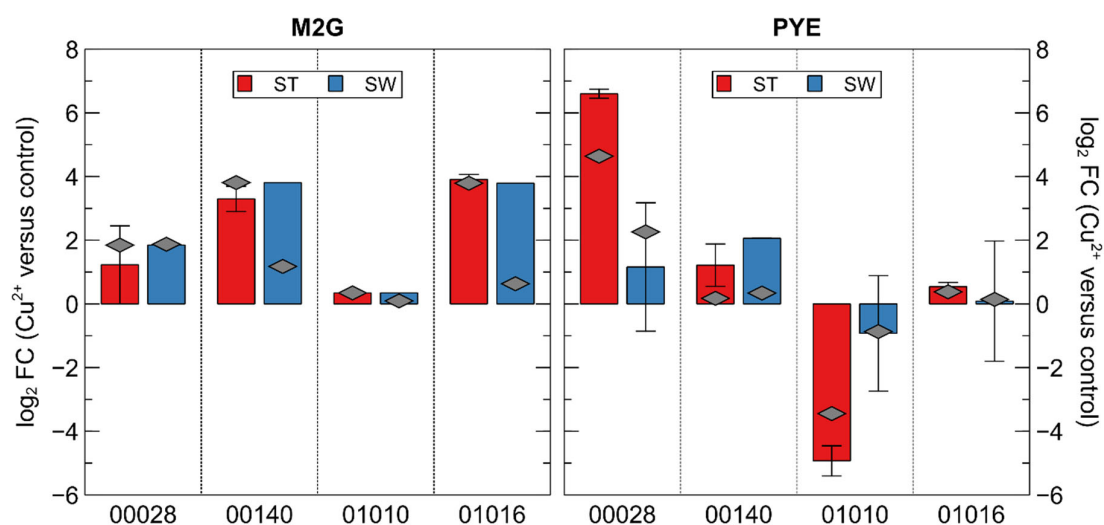

Supplementary Figure S1: Differential expression of 4 selected genes, in stalked cells (ST) and swarmer cells (SW) in 2 culture media (M2G and PYE). Bars represent log<sub>2</sub> fold change values from qRT-PCR data, with diamonds representing log<sub>2</sub> fold changes calculated with tagRNA-seq. CCNA accession numbers are shown at the bottom.
